# Supplementary material for: Tracking cells in Life Cell Imaging videos using topological alignments
Source: Springer Nature journal article supplement (doi:10.1186/1748-7188-4-10), 2009-07-16
Supplement: 13015_2008_67_MOESM3_ESM.pdf [file 13015_2008_67_MOESM3_ESM.pdf]

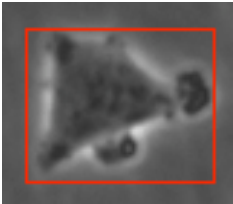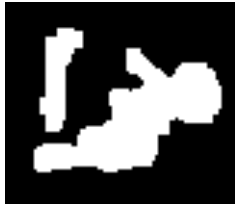

*over-segmentation*: One cell is split into two segments

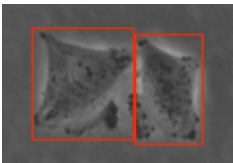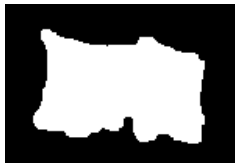

*under-segmentation*: One segment fully covers two cells

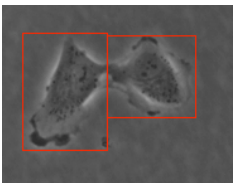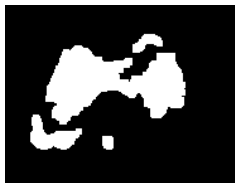

*mis-segmentation*: One segment over-laps two (or more) cells, but has partial overlap with either of the cells.
