# Supplementary material for: Tracking cells in Life Cell Imaging videos using topological alignments
Source: Springer Nature journal article supplement (doi:10.1186/1748-7188-4-10), 2009-07-16
Supplement: 13015_2008_67_MOESM4_ESM.pdf [file 13015_2008_67_MOESM4_ESM.pdf]

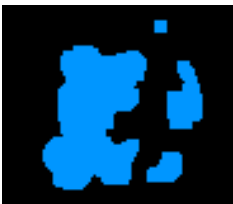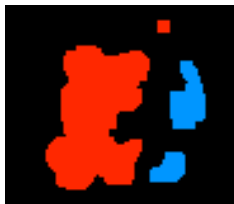

*over-partitioning*: One cell (i.e., one color in the ground truth annotation) receives two (or more) colors

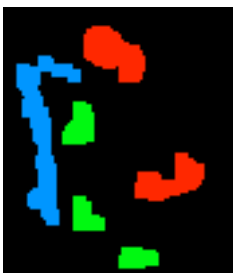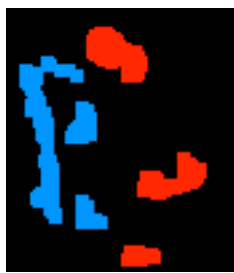

*under-partitioning*: Two ground-truth cells (i.e., colors) receive the same color

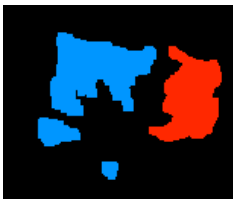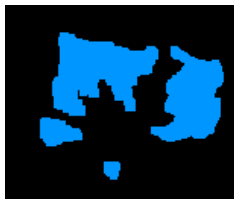

*mis-partitioning*: One color partially overlaps with two cells.
