# Supplementary material for: Tracking cells in Life Cell Imaging videos using topological alignments
Source: Springer Nature journal article supplement (doi:10.1186/1748-7188-4-10), 2009-07-16

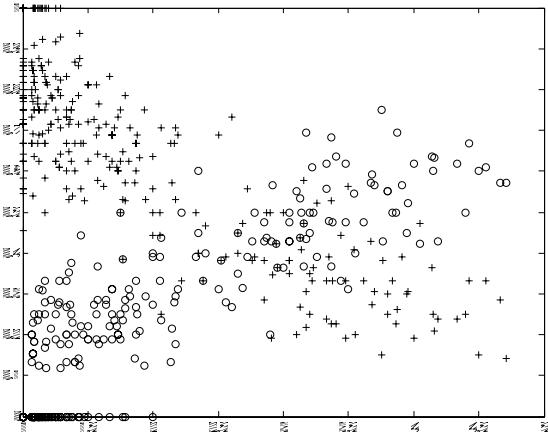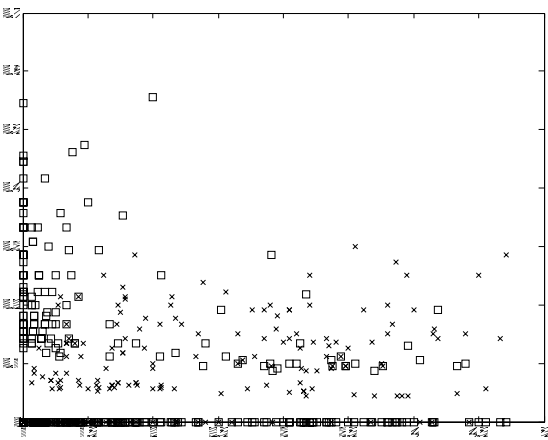

Supplement: 13015_2008_67_MOESM6_ESM.pdf [file 13015_2008_67_MOESM6_ESM.pdf]
